# Supplementary material for: Evaluation of the Efficacy and Safety of Silver Nanoparticles in the Treatment of Non-Neurological and Neurological Distemper in Dogs: A Randomized Clinical Trial
Source: MDPI journal article supplement (doi:10.3390/v14112329), 2022-10-24
Supplement: s1 [file s1]

**Table S3.** Characteristics and results obtained for the dogs with non-neurological distemper treated with only supportive therapy (Group 1b).

| No. | Breed                                      | Sex | Age (months) | Weight (kg) | IgM Value | Temp. (°C) | RT-PCR   | Clinical signs                                                                                                                                                                       | Report                      |
|-----|--------------------------------------------|-----|--------------|-------------|-----------|------------|----------|--------------------------------------------------------------------------------------------------------------------------------------------------------------------------------------|-----------------------------|
| 1   | Scottish Terrier                           | M   | 112          | 11          | 1:40      | 39.8       | Positive | Respiratory, keratoconjunctivitis, runny nose, cachexia, posterior myoclonus in thoracic and maxillofacial limbs.                                                                    | Died.                       |
| 2   | Golden Retriever cross                     | F   | 120          | 19          | 1:160     | 39.6       | Positive | Respiratory, weight loss, conjunctivitis, melena, evolved to seizures. Digestive, headaches, cachexia.                                                                               | Recovered without sequelae. |
| 3   | Pit Bull                                   | F   | 6            | 16          | 1:80      | 39.7       | Positive | keratoconjunctivitis, melena, corneal ulcer, later convulsive. Respiratory, conjunctivitis, corneal opacity, cachexia, nasal and plantar keratosis, subsequent complete prostration. | Died.                       |
| 4   | Golden Retriever                           | M   | 18           | 22          | 1:160     | 40.2       | Positive | Respiratory, conjunctivitis, ataxia, later convulsive. Respiratory, keratoconjunctivitis, cachexia, plantar keratosis, evolved to seizures.                                          | Died.                       |
| 5   | German Shepherd                            | M   | 48           | 36          | 1:80      | 39.9       | Positive | Digestive, melena, weight loss, lethargy, subsequent prostration and diaphragm myoclonus.                                                                                            | Died.                       |
| 6   | Cross German Shepherd and Belgian Shepherd | F   | 24           | 23          | 1:40      | 40.0       | Positive |                                                                                                                                                                                      | Died.                       |
| 7   | Creole                                     | M   | 15           | 18          | 1:360     | 39.5       | Positive |                                                                                                                                                                                      | Recovered without sequelae. |

|    |                    |   |    |     |       |      |          |                                                                                                                                   |              |
|----|--------------------|---|----|-----|-------|------|----------|-----------------------------------------------------------------------------------------------------------------------------------|--------------|
| 8  | Creole             | F | 48 | 10  | 1:80  | 39.8 | Positive | Respiratory, corneal ulcer, secretions within the nasolacrimal duct, cachexia, nasal keratosis, posterior ataxia and prostration. | Euthanasia*. |
| 9  | Poodle             | F | 84 | 6.4 | 1:80  | 40.5 | Positive | Respiratory, cachexia, decayed, melena, runny nose and nasal and plantar keratosis.                                               | Died.        |
| 10 | Chihuahua cross    | M | 36 | 4.9 | 1:40  | 40.0 | Positive | Respiratory, melena, corneal opacity, headache, plantar keratosis, evolved to seizures.                                           | Died.        |
| 11 | American Pit Bull  | M | 60 | 26  | 1:160 | 38.8 | Positive | Respiratory, lethargy, cachexia, conjunctivitis with discharge, melena, posterior myoclonus in the pelvic limbs.                  | Died.        |
| 12 | Pit Bull mix       | F | 24 | 18  | 1:80  | 41.0 | Positive | Respiratory, corneal opacity, nasal and plantar keratosis, posterior general myoclonus.                                           | Euthanasia.  |
| 13 | Creole             | M | 12 | 12  | 1:40  | 39.5 | Positive | Respiratory, nasal discharge and keratosis, corneal opacity, evolved to seizures.                                                 | Died.        |
| 14 | Creole             | M | 72 | 30  | 1:160 | 39.9 | Positive | Digestive, melena, cachexia, keratoconjunctivitis, posterior mandibular tics and loss of swallowing reflex.                       | Died.        |
| 15 | Mix Maltese Poodle | F | 60 | 8   | 1:160 | 40.2 | Positive | Respiratory, weight loss, melena, evolved to seizures.                                                                            | Euthanasia*. |

|    |                       |   |     |     |       |      |          |                                                                                                          |                                       |
|----|-----------------------|---|-----|-----|-------|------|----------|----------------------------------------------------------------------------------------------------------|---------------------------------------|
| 16 | Cross Schnauzer       | F | 21  | 7   | 1:320 | 39.5 | Positive | Digestive, melena, cachexia, decay, keratosis, evolved to seizures.                                      | Recovered without sequelae.           |
| 17 | Cross Pug - Chihuahua | M | 24  | 5.5 | 1:80  | 39.9 | Positive | Respiratory, nasal and ophthalmic discharge, cachexia, evolved to seizures.                              | Died.                                 |
| 18 | Boston Terrier        | F | 84  | 14  | 1:40  | 40.0 | Positive | Respiratory, conjunctivitis, nasal and plantar keratosis, evolved to seizures.                           | Died.                                 |
| 19 | Belgian Shepherd      | F | 36  | 21  | 1:160 | 40.0 | Positive | Respiratory, weight loss, conjunctivitis with discharge, keratosis, later parietal and jaw tics.         | Recovered with neurological sequelae. |
| 20 | Creole                | M | n/d | 8.5 | 1:160 | 39.7 | Positive | Respiratory and digestive, melena, runny nose, keratosis, cachexia, posterior myoclonus and prostration. | Euthanasia*.                          |
| 21 | Creole.               | M | 42  | 23  | 1:320 | 40.3 | Positive | Digestive, melena, weight loss, keratosis, evolved to myoclonus.                                         | Euthanasia*.                          |
| 22 | Poodle mix            | M | 72  | 7   | 1:40  | 39.8 | Positive | Respiratory, cachexia, runny nose and keratoconjunctivitis, evolved to myoclonus.                        | Died.                                 |
| 23 | Husky cross           | F | 18  | 16  | 1:80  | 40.5 | Positive | Respiratory, weight loss, nasal discharge, plantar keratosis, evolved to seizures.                       | Died.                                 |
| 24 | Creole                | F | 36  | 24  | 1:320 | 40.1 | Positive | Respiratory and digestive, melena and keratoconjunctivitis                                               | Died.                                 |

|    |                        |   |     |     |       |      |          |                                                                                                                                     |                           |
|----|------------------------|---|-----|-----|-------|------|----------|-------------------------------------------------------------------------------------------------------------------------------------|---------------------------|
|    |                        |   |     |     |       |      |          | tis, evolved to general neurological.                                                                                               |                           |
| 25 | Belgian Shepherd       | F | 72  | 21  | 1:160 | 39.6 | Positive | Digestive, cachexia, melena, later prostration.                                                                                     | Died.                     |
| 26 | Pug                    | M | 120 | 6.3 | 1:80  | 39.4 | Positive | Respiratory, keratoconjunctivitis, cachexia, posterior prostration.                                                                 | Euthanasia*.              |
| 27 | Creole                 | F | 108 | 19  | 1:40  | 40.1 | Positive | Digestive, weight loss, corneal opacity, melena, prostration.                                                                       | Died.                     |
| 28 | Pit Bull mix           | M | 24  | 26  | 1:160 | 39.9 | Positive | Respiratory and digestive, melena, cachexia, corneal opacity, evolved to myoclonus.                                                 | Died.                     |
| 29 | Cross Chihuahua.       | F | 60  | 5.3 | 1:160 | 39.8 | Positive | Respiratory, corneal opacity, discharge and nasal keratosis, evolved to seizures.                                                   | Died.                     |
| 30 | Weimaraner             | F | 84  | 32  | 1:40  | 40.0 | Positive | Digestive, nasal keratosis, melena, keratoconjunctivitis, evolved to neurological with myoclonus.                                   | Died.                     |
| 31 | Creole                 | M | 48  | 16  | 1:80  | 40.2 | Positive | Respiratory, corneal opacity, nasal and ophthalmic discharge, plantar keratosis, weight loss, progressed to myoclonus and seizures. | Died.                     |
| 32 | Creole                 | M | 36  | 22  | 1:160 | 39.8 | Positive | Respiratory, digestive, with weight loss, melena, keratoconjunctivitis, evolved to seizures.                                        | Died.                     |
| 33 | Cross German Shepherd. | F | 72  | 27  | 1:320 | 40.3 | Positive | Respiratory, weight loss, nasal and ophthalmic                                                                                      | Recovered with neurologic |

|    |                        |   |     |    |       |      |          |                                                                                                                                                                                                                                                                                                                                                                                                                                                                                                                                                                                                                                                                                                                                          |                                                                                                                                       |
|----|------------------------|---|-----|----|-------|------|----------|------------------------------------------------------------------------------------------------------------------------------------------------------------------------------------------------------------------------------------------------------------------------------------------------------------------------------------------------------------------------------------------------------------------------------------------------------------------------------------------------------------------------------------------------------------------------------------------------------------------------------------------------------------------------------------------------------------------------------------------|---------------------------------------------------------------------------------------------------------------------------------------|
|    |                        |   |     |    |       |      |          | discharge, nasal and plantar keratosis, evolved to myoclonus and prostration. Respiratory, digestive, cachexia, keratosis, melena, evolved to ataxia. Digestive, cachexia, melena, keratosis, evolved to myoclonus and prostration. Respiratory, runny nose, keratoconjunctivitis, evolved to seizures. Respiratory, digestive, melena, conjunctivitis, nasal and ophthalmic discharge, cachexia, evolved to myoclonus. Respiratory, keratoconjunctivitis, corneal ulcer, progressive weight loss, evolution to prostration and myoclonus. Respiratory, runny nose and conjunctivitis, weight loss, keratosis, evolved to ataxia and myoclonus. Respiratory, digestive, melena, keratoconjunctivitis, evolved to myoclonus and seizures. | al sequelae. Recovered with neurological sequelae. Euthanasia*. Died. Euthanasia*. Died*. Recovered with neurological sequelae. Died. |
| 34 | Creole                 | F | 96  | 24 | 1:160 | 40.0 | Positive |                                                                                                                                                                                                                                                                                                                                                                                                                                                                                                                                                                                                                                                                                                                                          |                                                                                                                                       |
| 35 | Husky                  | M | 120 | 24 | 1:80  | 39.9 | Positive |                                                                                                                                                                                                                                                                                                                                                                                                                                                                                                                                                                                                                                                                                                                                          |                                                                                                                                       |
| 36 | Maltese                | M | 108 | 6  | 1:80  | 39.7 | Positive |                                                                                                                                                                                                                                                                                                                                                                                                                                                                                                                                                                                                                                                                                                                                          |                                                                                                                                       |
| 37 | Belgian Shepherd cross | M | 12  | 18 | 1:160 | 40.2 | Positive |                                                                                                                                                                                                                                                                                                                                                                                                                                                                                                                                                                                                                                                                                                                                          |                                                                                                                                       |
| 38 | Creole                 | F | 36  | 15 | 1:40  | 40.0 | Positive |                                                                                                                                                                                                                                                                                                                                                                                                                                                                                                                                                                                                                                                                                                                                          |                                                                                                                                       |
| 39 | Pit bull blue          | F | 60  | 22 | 1:320 | 40.3 | Positive |                                                                                                                                                                                                                                                                                                                                                                                                                                                                                                                                                                                                                                                                                                                                          |                                                                                                                                       |
| 40 | Rottweiler cross       | M | 24  | 25 | 1:160 | 40.0 | Positive |                                                                                                                                                                                                                                                                                                                                                                                                                                                                                                                                                                                                                                                                                                                                          |                                                                                                                                       |

|    |                 |   |     |    |       |      |          |                                                                                                                      |       |
|----|-----------------|---|-----|----|-------|------|----------|----------------------------------------------------------------------------------------------------------------------|-------|
| 41 | Creole          | M | N/D | 18 | 1:80  | 39.9 | Positive | Digestive, cachexia, melena, corneal opacity, keratosis, evolved to ataxia and general myoclonus                     | Died. |
| 42 | Labrador        | F | 48  | 20 | 1:40  | 39.8 | Positive | Digestive, weight loss, melena, conjunctivitis, keratosis, evolved to seizures.                                      | Died. |
| 43 | Cross Boxer     | M | 84  | 24 | 1:80  | 40.5 | Positive | Respiratory, keratoconjunctivitis, cachexia, plantar keratosis, evolved to seizures.                                 | Died. |
| 44 | Chow Chow cross | M | 96  | 22 | 1:40  | 40.1 | Positive | Respiratory, nasal and plantar keratosis, corneal ulcer, weight loss, evolved to seizures.                           | Died. |
| 45 | Creole          | F | 18  | 20 | 1:160 | 39.9 | Positive | Respiratory, nasal and ophthalmic discharge, corneal opacity, cachexia, evolved to myoclonus in limbs and parietals. | Died. |
| 46 | Pit Bull        | F | 72  | 18 | 1:160 | 40.2 | Positive | Respiratory and digestive conjunctivitis with discharge, cachexia, melena, evolved to prostration and seizures.      | Died. |

M: Male, F: Female, Kg: Kilogram, IgM: Virus-specific immunoglobulin M/Value of immunoglobulin M, Indirect Immunofluorescent Assay (IFA) test was used for the quantification of the IgM, Temp.: Temperature, RT-PCR: Reverse Transcriptase Polymerase Chain Reaction, \*Due to the general discomfort of the dog, the owner suspended the treatment and decided to euthanize.
