# Supplementary material for: Evaluation of the Efficacy and Safety of Silver Nanoparticles in the Treatment of Non-Neurological and Neurological Distemper in Dogs: A Randomized Clinical Trial
Source: MDPI journal article supplement (doi:10.3390/v14112329), 2022-10-24
Supplement: s1 [file s1]

**Table S4.** Characteristics and results obtained for the dogs with neurological distemper treated with AgNPs (Group 2a).

| No. | Breed       | Sex | Age (months) | Weight (kg) | IgM Value | Temperature (°C) | RT-PCR   | Clinical signs                                                                                    | Report                                |
|-----|-------------|-----|--------------|-------------|-----------|------------------|----------|---------------------------------------------------------------------------------------------------|---------------------------------------|
| 1   | Pit Bull    | F   | 72           | 27          | 1:160     | 40.9             | Positive | Neurological, respiratory, myoclonus and temporary conjunctivitis.                                | Recovered without sequelae.           |
| 2   | Pit Bull    | F   | 29           | 28          | 1:320     | 40.6             | Positive | Neurological, respiratory, corneal opacity conjunctivitis and general myoclonus.                  | Recovered with neurological sequelae. |
| 3   | Poodle mix. | M   | 12           | 9           | 1:160     | 40.6             | Positive | Neurological, digestive, melena diarrhea, conjunctivitis, keratosis and ataxia.                   | Recovered without sequelae.           |
| 4   | Creole      | M   | 84           | 20          | 1:80      | 41.1             | Positive | Neurological, cachexic, ataxic, forelimb tremors and keratosis.                                   | Recovered without sequelae.           |
| 5   | Pit Bull    | M   | 12           | 22          | 1:80      | 39.9             | Positive | Neurological, respiratory, digestive, swollen glands, throat, conjunctivitis and melena diarrhea. | No recovered, Euthanasia.             |
| 6   | Schnauzer   | F   | 132          | 6.5         | 1:320     | 40.9             | Positive | Neurological, prostration, myoclonus in limbs and parietals.                                      | Recovered without sequelae.           |

|    |                |   |    |     |       |      |          |                                                                                |                                       |
|----|----------------|---|----|-----|-------|------|----------|--------------------------------------------------------------------------------|---------------------------------------|
| 7  | Mixed          | F | 12 | 20  | 1:80  | 40.9 | Positive | Neurological, respiratory, ataxia, keratoconjunctivitis, melena and myoclonus. | Recovered without sequelae.           |
| 8  | Creole         | M | 84 | 22  | 1:80  | 39.7 | Positive | Neurological, cachexia, conjunctivitis, tremors in limbs and convulsive.       | Recovered without sequelae.           |
| 9  | Husky          | F | 36 | 26  | 1:160 | 40.1 | Positive | Neurological, tremors, ataxia, conjunctivitis and keratosis.                   | Recovered without sequelae.           |
| 10 | Pug            | F | 60 | 6   | 1:80  | 40.2 | Positive | Neurological, keratoconjunctivitis and seemed posterior.                       | No recovered, Euthanasia. *           |
| 11 | Pug            | M | 48 | 6.5 | 1:160 | 39.7 | Positive | Neurological, convulsive and myoclonus.                                        | No recovered, Euthanasia. *           |
| 12 | Creole         | F | 41 | 25  | 1:80  | 40.7 | Positive | Neurological, keratosis, melena, ataxia and tic in the jaw.                    | Recovered with neurological sequelae. |
| 13 | Chihuahua Mix. | M | 12 | 7   | 1:80  | 40.8 | Positive | Neurological, myoclonus in the forelimbs and parietal.                         | No recovered, Euthanasia. *           |

|    |                  |   |     |     |       |      |          |                                                                                                          |                                       |
|----|------------------|---|-----|-----|-------|------|----------|----------------------------------------------------------------------------------------------------------|---------------------------------------|
| 14 | Belgian Shepherd | F | 48  | 16  | 1:80  | 39.7 | Positive | Neurological, convulsive, keratosis, cachexia and general myoclonus.                                     | Died.                                 |
| 15 | Rottweiler       | M | 36  | 32  | 1:320 | 39.9 | Positive | Neurological, Respiratory, keratoconjunctivitis, ataxia and parietal myoclonus.                          | Recovered without sequelae.           |
| 16 | Pit Bull         | M | 24  | 31  | 1:80  | 41.1 | Positive | Neurological, digestive, melena, runny nose, conjunctivitis, ataxia and seizures.                        | Died.                                 |
| 17 | Chihuahua        | F | 36  | 4   | 1:160 | 40.9 | Positive | Respiratory, neurological, conjunctivitis and melena, tic in the jaw and parietal.                       | Recovered without sequelae.           |
| 18 | Poodle-Malte     | M | 84  | 7.5 | 1:80  | 40.0 | Positive | Respiratory, neurological, cachexia, conjunctivitis, runny nose, tics in the abdomen and hind limb.      | Recovered without sequelae.           |
| 19 | Creole           | M | 72  | 18  | 1:160 | 39.8 | Positive | Neurological, digestive, vomiting, melena diarrhea, conjunctivitis, keratosis, ataxia and abdominal tic. | Recovered without sequelae.           |
| 20 | Yorkshire        | F | 24  | 3.5 | 1:80  | 40.2 | Positive | Neurological, respiratory, corneal opacity, keratosis and cachexia, ataxia and tremors.                  | Recovered with neurological sequelae. |
| 21 | Rottweiler       | F | 48  | 30  | 1:160 | 40.4 | Positive | Respiratory, neurological, digestive, conjunctivitis, melena and tic in the forelimb.                    | Recovered without sequelae.           |
| 22 | German           | M | 108 | 36  | 1:80  | 40.2 | Positive | Neurological, cachexia, conjunctivitis, keratosis, ataxia, myoclonus and tremors.                        | Recovered.                            |

|        |                     |   |    |     |           |          |              |                                                                                      |                                                                                                                                                                                                                                                                                                                                                                                                               |
|--------|---------------------|---|----|-----|-----------|----------|--------------|--------------------------------------------------------------------------------------|---------------------------------------------------------------------------------------------------------------------------------------------------------------------------------------------------------------------------------------------------------------------------------------------------------------------------------------------------------------------------------------------------------------|
|        | Shepherd            |   |    |     |           |          |              |                                                                                      | with<br>out<br>sequ<br>elae.<br>Reco<br>vere<br>d<br>with<br>out<br>sequ<br>elae.<br>Reco<br>vere<br>d<br>with<br>out<br>sequ<br>elae.<br>Reco<br>vere<br>d<br>with<br>out<br>sequ<br>elae.<br>Reco<br>vere<br>d<br>with<br>neur<br>olog<br>ical<br>sequ<br>elae.<br>Reco<br>vere<br>d<br>with<br>neur<br>olog<br>ical<br>sequ<br>elae.<br>Reco<br>vere<br>d<br>with<br>neur<br>olog<br>ical<br>sequ<br>elae. |
| 2<br>3 | Schnau<br>zer       | F | 72 | 8   | 1:32<br>0 | 39<br>.8 | Posi<br>tive | Respiratory, neurological, conjunctivitis,<br>cough and ataxia.                      |                                                                                                                                                                                                                                                                                                                                                                                                               |
| 2<br>4 | GDP<br>Bulldog      | M | 41 | 30  | 1:16<br>0 | 40<br>.2 | Posi<br>tive | Neurological, respiratory, runny nose,<br>temporal myoclonus and total prostration.  |                                                                                                                                                                                                                                                                                                                                                                                                               |
| 2<br>5 | Golden<br>Retriever | F | 24 | 24  | 1:80      | 39<br>.9 | Posi<br>tive | Respiratory, digestive, melena-diarrhea,<br>keratosis, conjunctivitis and ataxia.    |                                                                                                                                                                                                                                                                                                                                                                                                               |
| 2<br>6 | Belgian<br>Shepherd | F | 24 | 22  | 1:16<br>0 | 40<br>.2 | Posi<br>tive | Digestive, neurological, cachexia, diarrhea,<br>keratosis and general myoclonus.     |                                                                                                                                                                                                                                                                                                                                                                                                               |
| 2<br>7 | Mixed<br>Doberman   | F | 96 | 28  | 1:40      | 40<br>.6 | Posi<br>tive | Neurological, respiratory, opaque corneal<br>conjunctivitis, myoclonus and seizures. |                                                                                                                                                                                                                                                                                                                                                                                                               |
| 2<br>8 | Pug                 | M | 13 | 6.5 | 1:80      | 39<br>.9 | Posi<br>tive | Neurological and respiratory.                                                        |                                                                                                                                                                                                                                                                                                                                                                                                               |

|    |           |   |     |     |           |          |          |                                                                                                     |                                                                                                                    |
|----|-----------|---|-----|-----|-----------|----------|----------|-----------------------------------------------------------------------------------------------------|--------------------------------------------------------------------------------------------------------------------|
| 29 | Creole    | F | 12  | 9   | 1:16<br>0 | 40<br>.3 | Positive | Respiratory, digestive, neurological, diarrhea, conjunctivitis, ataxia and tic in four limbs.       | Died .                                                                                                             |
| 30 | Boxer     | M | 9   | 15  | 1:16<br>0 | 40<br>.6 | Positive | Neurological, digestive, ataxia, melena and tic in the diaphragm.                                   | Recovered without sequelae. Recovered with out sequelae. Recovered with out sequelae. Recovered with out sequelae. |
| 31 | Chihuahua | F | 72  | 3.5 | 1:80      | 39<br>.6 | Positive | Neurological respiratory, nasal and ophthalmic discharge, temporal tremors and tic in the jaw.      | Recovered with out sequelae. Recovered with out sequelae. Recovered with out sequelae.                             |
| 32 | Labrador  | M | 24  | 23  | 1:16<br>0 | 41<br>.1 | Positive | Digestive, neurological, cachexia, diarrhea, melena, ataxia and abdominal spasm.                    | Recovered with out sequelae. Recovered with out sequelae. Recovered with out sequelae.                             |
| 33 | Cocker    | F | 120 | 12  | 1:16<br>0 | 39<br>.9 | Positive | Digestive, diarrhea, vomiting, neurological, keratoconjunctivitis, frontal claudication and ataxia. | Recovered with neurological sequelae. Recovered with out sequelae. Recovered with out sequelae.                    |
| 34 | Pit Bull  | M | 23  | 28  | 1:40      | 39<br>.9 | Positive | Respiratory corneal opacity. Neurological, tremors and abdominal tic.                               | Recovered with out sequelae. Recovered with out sequelae. Recovered with out sequelae.                             |
| 35 | Poodle    | F | 36  | 8   | 1:16<br>0 | 40<br>.2 | Positive | Digestive, diarrhea, melena. Neurological, tic in the abdomen, tremors and general pain.            | Recovered with out sequelae. Recovered with out sequelae. Recovered with out sequelae.                             |
| 36 | Akita     | M | 60  | 38  | 1:16<br>0 | 40<br>.7 | Positive | Neurological, cachexic, ataxic, posterior prostration and keratosis.                                | Recovered with out sequelae. Recovered with out sequelae. Recovered with out sequelae.                             |

|    |                  |   |     |     |       |      |          |                                                                                         |                                                                                                                                                    |
|----|------------------|---|-----|-----|-------|------|----------|-----------------------------------------------------------------------------------------|----------------------------------------------------------------------------------------------------------------------------------------------------|
| 37 | Mixed Dachshunds | M | 24  | 5   | 1:80  | 40.5 | Positive | Respiratory, neurological, keratoconjunctivitis, seizures and prostration.              | sequelae. Euthanasia. Recovered without sequelae. Recovered with out sequelae. Recovered with out sequelae. Recovered with neur ological sequelae. |
| 38 | Husky            | F | 48  | 23  | 1:320 | 39.9 | Positive | Neurological, digestive, conjunctivitis and melena diarrhea, forelimb and parietal tic. | Died . Recovered with out sequelae. Died . Recovered with out sequelae.                                                                            |
| 39 | German Shepherd  | M | 12  | 28  | 1:80  | 40.0 | Positive | Neurological, respiratory, keratoconjunctivitis and diaphragm and temporal tics.        | Recovered with out sequelae. Recovered with out sequelae. Recovered with out sequelae.                                                             |
| 40 | Shiatzu          | M | 60  | 4   | 1:160 | 39.8 | Positive | Neurological, keratoconjunctivitis and ataxia and parietal tremor.                      | Recovered with out sequelae. Recovered with out sequelae. Recovered with out sequelae.                                                             |
| 41 | Creole           | F | 36  | 17  | 1:40  | 40.3 | Positive | Neurological, conjunctivitis, keratosis, ataxia and parietal tic and abdominal spasm.   | Died . Recovered with out sequelae. Recovered with out sequelae.                                                                                   |
| 42 | Golden           | M | 72  | 22  | 1:160 | 40.5 | Positive | Respiratory, digestive, melena, conjunctivitis and keratosis, abdominal spasm.          | Died . Recovered with out sequelae. Recovered with out sequelae.                                                                                   |
| 43 | Creole           | F | 0.7 | 22  | 1:160 | 40.2 | Positive | Respiratory, nasal and ophthalmic discharge, conjunctivitis and keratosis, seizures.    | Died . Recovered with out sequelae. Recovered with out sequelae.                                                                                   |
| 44 | Mixed            | M | 24  | 7   | 1:80  | 39.0 | Positive | Neurological, ataxia, keratoconjunctivitis, melena and myoclonus.                       | Died . Recovered with out sequelae. Recovered with out sequelae.                                                                                   |
| 45 | Chihuahua        | M | 24  | 2.5 | 1:40  | 40.1 | Positive | Neurological, conjunctivitis, melena and keratosis.                                     | Died . Recovered with out sequelae. Recovered with out sequelae.                                                                                   |

|    |               |   |     |     |           |          |          |                                                                                                                 |                                                                               |
|----|---------------|---|-----|-----|-----------|----------|----------|-----------------------------------------------------------------------------------------------------------------|-------------------------------------------------------------------------------|
| 46 | Pit bull      | M | 24  | 24  | 1:32<br>0 | 39<br>.8 | Positive | Respiratory, digestive, diarrhea melena conjunctivitis and evolved to seizures.                                 | Died.                                                                         |
| 47 | Husky         | M | 72  | 26  | 1:16<br>0 | 40<br>.9 | Positive | Respiratory, conjunctivitis, keratosis, melena. It progressed to ataxia and seizures.                           | Died.                                                                         |
| 48 | Chihuahua     | F | 108 | 4.5 | 1:40      | 39<br>.9 | Positive | Respiratory, runny nose, cachexia, conjunctivitis, evolved to complete prostration and seizures.                | Euthanasia. Recovered with neurological sequelae.                             |
| 49 | Boston        | M | 96  | 19  | 1:80      | 40<br>.  | Positive | Respiratory, sneezing, cachexia, nasal discharge, corneal opacity and conjunctivitis, myoclonus in extremities. | Died.                                                                         |
| 50 | Pug           | M | 48  | 6   | 1:16<br>0 | 40<br>.0 | Positive | Respiratory, keratoconjunctivitis, corneal opacity and cachexia, parietal and maxillary myoclonus.              | Euthanasia. Recovered without sequelae. Recovered with neurological sequelae. |
| 51 | Labrador      | M | 36  | 25  | 1:80      | 40<br>.  | Positive | Respiratory, conjunctivitis, sneezing, secretions, cachexia and melena.                                         | Died.                                                                         |
| 52 | Boxer         | F | 48  | 22  | 1:16<br>0 | 39<br>.7 | Positive | Respiratory, digestive, melena, nasal and ophthalmic secretions, cachexia.                                      | Died.                                                                         |
| 53 | Schnauzer     | M | 72  | 9   | 1:32<br>0 | 39<br>.9 | Positive | Digestive, keratoconjunctivitis, bloody diarrhea and cachexia, prostration and seizures.                        | Died.                                                                         |
| 54 | Chihuahua-Pug | M | 12  | 5   | 1:80      | 40<br>.6 | Positive | Respiratory, keratoconjunctivitis, corneal opacity and cachexia, evolved to seizures.                           | Died.                                                                         |
| 55 | Pit Bull      | F | 4   | 7   | 1:80      | 39<br>.1 | Positive | Neurological, conjunctivitis and melena diarrhea.                                                               | Died.                                                                         |
| 56 | Chihuahua     | M | 108 | 3.5 | 1:16<br>0 | 40<br>.0 | Positive | Digestive, respiratory, cough, melena diarrhea, conjunctivitis, evolved to seizures.                            | Died.                                                                         |

|        |                           |   |     |    |           |          |              |                                                                                   |                     |
|--------|---------------------------|---|-----|----|-----------|----------|--------------|-----------------------------------------------------------------------------------|---------------------|
| 5<br>7 | Boxer-<br>Pit Bull<br>Mix | M | 24  | 20 | 1:80      | 40<br>.1 | Posi<br>tive | Respiratory, conjunctivitis, cachexia,<br>seizures, keratosis and opaque corneas. | Euth<br>anas<br>ia. |
| 5<br>8 | Chihua<br>hua             | F | 108 | 4  | 1:16<br>0 | 40<br>.1 | Posi<br>tive | Neurological, keratosis, loss of the<br>swallowing reflex and seizures.           | Died<br>.           |

M: Male, F: Female, Kg: Kilogram, IgM: Virus-specific immunoglobulin M/Value of immunoglobulin M, Indirect Immunofluorescent Assay (IFA) test was used for the quantification of the IgM, Temp.: Temperature, RT-PCR: Reverse Transcriptase Polymerase Chain Reaction, \*Due to the general discomfort of the dog, the owner suspended the treatment and decided to euthanize.
