# Supplementary material for: Evaluation of the Efficacy and Safety of Silver Nanoparticles in the Treatment of Non-Neurological and Neurological Distemper in Dogs: A Randomized Clinical Trial
Source: MDPI journal article supplement (doi:10.3390/v14112329), 2022-10-24
Supplement: s1 [file s1]

**Table S5.** Characteristics and results obtained for the dogs with neurological distemper treated with only supportive therapy (Group 2b).

| No. | Breed                  | Sex | Age (months) | Weight (kg) | IgM Value | Temp. (°C) | RT-PCR   | Clinical signs                                                                         | Report       |
|-----|------------------------|-----|--------------|-------------|-----------|------------|----------|----------------------------------------------------------------------------------------|--------------|
| 1   | Pit Bull               | F   | 84           | 28          | 1:40      | 40.1       | Positive | Temporal myoclonus, keratoconjunctivitis and tic in the maxilla.                       | Died.        |
| 2   | Pug                    | F   | 24           | 4           | 1:160     | 40.3       | Positive | Neurological, keratoconjunctivitis, seemed posterior and slight seizures.              | Died.        |
| 3   | Chihuahua Mix          | F   | 48           | 3.5         | 1:80      | 40.6       | Positive | Neurological, conjunctivitis, corneal opacity, keratosis, melena, ataxia and seizures. | Died.        |
| 4   | Husky                  | M   | 24           | 24          | 1:80      | 39.6       | Positive | Keratoconjunctivitis, ataxia, progressed to myoclonus and seizures.                    | Euthanasia*. |
| 5   | German Shepherd        | M   | 26           | 30          | 1:160     | 41.1       | Positive | Keratoconjunctivitis, cachexia, melena, and seizures.                                  | Euthanasia*. |
| 6   | Mixed Dalmatian        | F   | 27           | 22          | 1:80      | 39.7       | Positive | Runny nose, cachexia, keratoconjunctivitis and myoclonus legs.                         | Died.        |
| 7   | Creole                 | M   | 12           | 21          | 1:80      | 40.5       | Positive | Cachexia, diarrhea, abdominal spasm, and general myoclonus.                            | Died.        |
| 8   | Boxer Cross - Pit Bull | F   | 36           | 18          | 1:160     | 40.3       | Positive | Keratoconjunctivitis, melena, myoclonus, parietal and maxillary tics.                  | Euthanasia*. |
| 9   | Pit Bull               | M   | 60           | 25          | 1:160     | 39.9       | Positive | Seizures, keratoconjunctivitis, parietal myoclonus and left forelimb.                  | Died.        |
| 10  | Chihuahua              | F   | 72           | 3.6         | 1:320     | 40.4       | Positive | Keratoconjunctivitis, prostration                                                      | Died.        |

|    |                  |   |    |    |       |      |          |                                                                          |               |
|----|------------------|---|----|----|-------|------|----------|--------------------------------------------------------------------------|---------------|
|    |                  |   |    |    |       |      |          | and myoclonus and seizures.                                              |               |
| 11 | Creole           | M | 9  | 12 | 1:40  | 39.8 | Positive | Tremors, parietal myoclonus and maxillary tic.                           | Died.         |
| 12 | Creole           | F | 10 | 11 | 1:80  | 40.3 | Positive | Ataxia, conjunctivitis with discharge, parietal myoclonus, and seizures. | Died.         |
| 13 | Belgian Shepherd | F | 24 | 23 | 1:160 | 41.0 | Positive | Keratoconjunctivitis, diarrhea, ataxia, and seizures.                    | Died.         |
| 14 | Creole           | F | 24 | 12 | 1:40  | 38.7 | Positive | Keratoconjunctivitis, cachexia, melena, and seizures.                    | Died.         |
| 15 | Husky            | F | 60 | 26 | 1:40  | 39.6 | Positive | Keratoconjunctivitis, melena, ataxia and myoclonus in limbs.             | Euthanasia *. |
| 16 | German Shepherd  | F | 48 | 27 | 1:160 | 41.7 | Positive | Neurological, keratoconjunctivitis, ataxia with evolved to seizures.     | Died.         |
| 17 | Poodle           | M | 24 | 5  | 1:320 | 41.0 | Positive | Prostration, abdominal spasms and seizures.                              | Died.         |
| 18 | Schnauzer        | M | 72 | 8  | 1:80  | 40.5 | Positive | Temporal myoclonus and legs, evolved to seizures.                        | Euthanasia *. |
| 19 | Creole           | M | 36 | 8  | 1:80  | 40.1 | Positive | Ataxia, diarrhea, conjunctivitis, evolved to seizures.                   | Died.         |
| 20 | Chihuahua        | F | 84 | 4  | 1:160 | 39.9 | Positive | Nasal and plantar keratosis, prostration and seizures.                   | Euthanasia *. |
| 21 | Rottweiler       | F | 48 | 25 | 1:320 | 41.2 | Positive | Ataxia, abdominal spasm, progressed to prostration and seizures.         | Died.         |
| 22 | Maltese          | M | 96 | 7  | 1:40  | 40.2 | Positive | Keratoconjunctivitis, lower jaw tic, swallowing reflex paralysis.        | Died.         |

|    |                   |   |     |     |       |      |          |                                                                            |               |
|----|-------------------|---|-----|-----|-------|------|----------|----------------------------------------------------------------------------|---------------|
| 23 | Dachshund         | M | 36  | 6.3 | 1:320 | 39.9 | Positive | Cachexia, conjunctivitis, general myoclonus.                               | Died.         |
| 24 | Creole            | F | 60  | 5.5 | 1:80  | 40.1 | Positive | Ataxia, conjunctivitis with discharge, parietal myoclonus, seizures.       | Died.         |
| 25 | Boxer             | M | 36  | 23  | 1:40  | 39.8 | Positive | Prostration, tics in limbs and convulsions.                                | Died.         |
| 26 | Rottweiler        | M | 24  | 24  | 1:40  | 40.5 | Positive | Prostration, tic in the jaw, keratoconjunctivitis is melena.               | Euthanasia *. |
| 27 | Belgian Shepherd. | F | 96  | 21  | 1:160 | 40.2 | Positive | Ataxia, evolved to abdominal spasm and seizures.                           | Died.         |
| 28 | Australian pastor | M | 48  | 18  | 1:40  | 39.7 | Positive | Myoclonus in extremities, abdominal spasm, later prostration.              | Euthanasia *. |
| 29 | Maltese-Poodle    | F | 120 | 8   | 1:80  | 39.6 | Positive | Conjunctivitis, ataxia, progression to general myoclonus, and prostration. | Died.         |
| 30 | Schnauzer         | M | 48  | 7   | 1:320 | 39.9 | Positive | Conjunctivitis, cranial limb tics, seizures.                               | Euthanasia *. |
| 31 | Doberman          | M | 24  | 25  | 1:160 | 40.0 | Positive | Keratoconjunctivitis, abdominal spasm, jaw and parietal tics.              | Died.         |
| 32 | Yorkshire         | F | 96  | 3.4 | 1:40  | 41.2 | Positive | Seizures, ataxia, cachexia, and conjunctivitis.                            | Died.         |
| 33 | Golden retriever  | M | 72  | 22  | 1:40  | 40.2 | Positive | Cachexia, melena, conjunctivitis, subsequent prostration and coma.         | Died.         |
| 34 | Creole            | F | 60  | 17  | 1:320 | 39.6 | Positive | Cachexia, abdominal spasm, convulsive.                                     | Died.         |
| 35 | Creole            | F | 12  | 23  | 1:80  | 39.8 | Positive | Tics in the extremities and evolved to seizures.                           | Died.         |

|    |                      |   |     |     |       |      |          |                                                                                 |              |
|----|----------------------|---|-----|-----|-------|------|----------|---------------------------------------------------------------------------------|--------------|
| 36 | Pit Bull             | F | 12  | 22  | 1:40  | 40.5 | Positive | Keratoconjunctivitis, nervous tics in extremities, melena and cachexia.         | Died.        |
| 37 | Chihuahua            | M | 120 | 4.4 | 1:160 | 40.0 | Positive | Convulsive, ataxia, conjunctivitis, melena.                                     | Died.        |
| 38 | German shepherd      | F | 96  | 26  | 1:40  | 39.7 | Positive | Cachexia, melena, hindquarters and seizures.                                    | Euthanasia*. |
| 39 | Pug                  | M | 36  | 7   | 1:80  | 40.4 | Positive | Cachexia, runny nose and eye, seizures.                                         | Died.        |
| 40 | Chihuahua            | M | 60  | 3.5 | 1:40  | 39.9 | Positive | Conjunctivitis, ataxia, later limb tics and prostration.                        | Euthanasia*. |
| 41 | Cocker               | F | 24  | 8   | 1:40  | 40.1 | Positive | Conjunctivitis with discharge, cachexia, ataxia, seizures.                      | Euthanasia*. |
| 42 | Shiatzu              | F | 48  | 5   | 1:80  | 39.8 | Positive | Cachexia, melena, general myoclonus and seizures,                               | Died.        |
| 43 | Akita                | F | 72  | 35  | 1:40  | 40.3 | Positive | Nasal and plantar keratosis, cachexia, mandibular tics and cranial extremities. | Died.        |
| 44 | Creole               | M | 18  | 21  | 1:80  | 41.1 | Positive | Cachexia, melena, abdominal spasm, mandible and parietal myoclonus.             | Died.        |
| 45 | Sharpei cross        | M | 36  | 20  | 1:160 | 40.1 | Positive | Conjunctivitis, keratosis, cachexia, melena, and seizures.                      | Died.        |
| 46 | Belgian Shepherd     | F | 36  | 22  | 1:40  | 39.9 | Positive | General myoclonus and seizures.                                                 | Euthanasia*. |
| 47 | Bull terrier         | M | 84  | 15  | 1:320 | 40.8 | Positive | Conjunctivitis, cachexia, ataxia, and seizures.                                 | Euthanasia*. |
| 48 | Old English Shepherd | M | 108 | 24  | 1:40  | 40.3 | Positive | Convulsive, cachexia, melena and keratosis.                                     | Died.        |
| 49 | Creole               | F | n/d | 12  | 1:80  | 40.4 | Positive | Cachexia, ataxia, myoclonus in the                                              | Died.        |

|    |                |   |     |    |       |      |          |                                                                                                                                                                                                |                  |
|----|----------------|---|-----|----|-------|------|----------|------------------------------------------------------------------------------------------------------------------------------------------------------------------------------------------------|------------------|
|    |                |   |     |    |       |      |          | caudal extremities<br>and final<br>prostration.<br>Keratoses,<br>conjunctivitis,<br>parietal<br>myoclonus and<br>mandible.<br>Myoclonus in<br>extremities,<br>abdominal spasm<br>and seizures. |                  |
| 50 | Doberman       | F | 36  | 24 | 1:160 | 39.8 | Positive |                                                                                                                                                                                                | Died.            |
| 51 | Boxer<br>cross | M | 108 | 19 | 1:40  | 40.0 | Positive |                                                                                                                                                                                                | Euthanasia<br>*. |

M: Male, F: Female, Kg: Kilogram, IgM: Virus-specific immunoglobulin M/Value of immunoglobulin M, Indirect Immunofluorescent Assay (IFA) test was used for the quantification of the IgM, Temp.: Temperature, RT-PCR: Reverse Transcriptase Polymerase Chain Reaction, \*Due to the general discomfort of the dog, the owner suspended the treatment and decided to euthanize.
