# Supplementary material for: Evaluation of the Efficacy and Safety of Silver Nanoparticles in the Treatment of Non-Neurological and Neurological Distemper in Dogs: A Randomized Clinical Trial
Source: MDPI journal article supplement (doi:10.3390/v14112329), 2022-10-24
Supplement: s1 [file s1]

**Table S2.** Characteristics and results obtained for the dogs with non-neurological distemper treated with AgNPs (Group 1a).

| No. | Breed             | Sex | Age (months) | Weight (kg) | Ig M Value | Tem. (°C) | RT-PCR   | Clinical signs                                                                                           | Report                      |
|-----|-------------------|-----|--------------|-------------|------------|-----------|----------|----------------------------------------------------------------------------------------------------------|-----------------------------|
| 1   | Boston Terrier    | M   | 36           | 14          | 1:160      | 40.1      | Positive | Respiratory disease, chronic cough, tracheobronchitis, eye discharge and did not respond to antibiotics. | Recovered without sequelae. |
| 2   | American Pit Bull | M   | 3            | 3.2         | 1:80       | 40.0      | Positive | Respiratory, runny nose, conjunctivitis and keratosis.                                                   | Recovered without sequelae. |
| 3   | Creole            | F   | 4            | 3           | 1:160      | 39.9      | Positive | Respiratory, neurological, conjunctivitis, melena.                                                       | Recovered without sequelae. |
| 4   | Chihuahua         | M   | 5            | 2.2         | 1:320      | 39.8      | Positive | Respiratory, cachexia, corneal opacity, conjunctivitis and keratosis.                                    | Recovered without sequelae. |
| 5   | Chihuahua Mix.    | F   | 8            | 4.5         | 1:40       | 39.9      | Positive | Respiratory, conjunctivitis, keratosis and cachexia.                                                     | Died.                       |
| 6   | German Shepherd   | F   | 6            | 20          | 1:160      | 40.0      | Positive | Respiratory, runny nose, conjunctivitis, keratosis and cachexia.                                         | Recovered without sequelae. |
| 7   | Mixed             | M   | 8            | 18          | 1:160      | 40.1      | Positive | Respiratory, digestive, conjunctivitis, melena, keratoconjunctivitis, jaw tics.                          | Recovered with neurological |

|    |                  |   |     |     |        |                   |          |                                                                        |                                                                                     |
|----|------------------|---|-----|-----|--------|-------------------|----------|------------------------------------------------------------------------|-------------------------------------------------------------------------------------|
| 8  | Poodle Mix.      | M | 60  | 11  | 1: 320 | 40.3              | Positive | Respiratory, cachexia, conjunctivitis, keratosis, and corneal opacity. | Died.                                                                               |
| 9  | Creole           | F | 6   | 6   | 1: 80  | 39.6              | Positive | Respiratory, cachexia, conjunctivitis, cough, keratosis.               | Recovered without sequelae. Recovered without sequelae. Recovered without sequelae. |
| 10 | Sharpei          | F | 60  | 22  | 1: 80  | 39.9              | Positive | Respiratory, keratosis and conjunctivitis and runny nose.              | Recovered without sequelae. Recovered without sequelae.                             |
| 11 | Schnauzer        | M | 6   | 5   | 1: 160 | 39.5              | Positive | Bacterial respiratory disease, cough and runny nose.                   | Recovered without sequelae. Recovered without sequelae.                             |
| 12 | Weimaraner       | M | 84  | 35  | n/d    | 39.5 <sup>a</sup> | Positive | Respiratory disease, persistent cough, and laryngotracheitis.          | Recovered without sequelae. Recovered without sequelae.                             |
| 13 | Creole           | F | 15  | 12  | 1: 160 | 40.5              | Positive | Respiratory, digestive, diarrhea, conjunctivitis and keratosis         | Recovered without sequelae.                                                         |
| 14 | Dachshund        | F | 30  | 4.5 | 1: 80  | 39.6              | Positive | Respiratory, nasal and ocular discharge and keratosis.                 | Died.                                                                               |
| 15 | Scottish Terrier | M | 120 | 9   | 1: 320 | 40.3              | Positive | Digestive, cachexia, bloody diarrhea and abdominal spasm.              | Recovered without sequelae.                                                         |

|    |                 |   |     |     |       |      |          |                                                                                   |                                       |
|----|-----------------|---|-----|-----|-------|------|----------|-----------------------------------------------------------------------------------|---------------------------------------|
| 16 | Pit Bull        | F | 24  | 24  | 1:160 | 41.0 | Positive | Digestive, diarrhea, vomiting, keratoconjunctivitis, corneal opacity, myoclonus.  | Recovered with neurological sequelae. |
| 17 | Chihuahua Mix   | M | 132 | 2.8 | 1:160 | 39.9 | Positive | Respiratory, digestive, conjunctivitis and corneal opacity, keratosis and melena. | Recovered without sequelae.           |
| 18 | Maltese         | M | 48  | 8   | 1:160 | 40.8 | Positive | Digestive, melena diarrhea and keratosis, cachexia                                | Recovered without sequelae.           |
| 19 | Doberman        | F | 72  | 34  | 1:320 | 40.5 | Positive | Respiratory, keratoconjunctivitis, throat inflammation and cough.                 | Recovered without sequelae.           |
| 20 | Poodle          | F | 5   | 3   | 1:40  | 40.3 | Positive | Respiratory, keratoconjunctivitis,                                                | Recovered without sequelae.           |
| 21 | Chihuahua       | F | 12  | 2.5 | 1:40  | 40.4 | Positive | Respiratory, digestive, diarrhea with melena and prostration.                     | Died.                                 |
| 22 | Creole          | M | 22  | 26  | 1:80  | 37.1 | Positive | Respiratory and digestive disease, cachexic, runny nose and mucous diarrhea.      | Died.                                 |
| 23 | German Shepherd | F | 12  | 28  | 1:160 | 40.1 | Positive | Respiratory, anorexia, cachexia, keratoconjunctivitis and airway inflammation.    | Recovered without sequelae.           |
| 24 | Chihuahua       | M | 60  | 3.5 | 1:320 | 39.9 | Positive | Respiratory, runny nose, ophthalmic, cough, keratosis and melena.                 | Recovered.                            |

|    |                  |   |    |    |       |      |          |                                                                                 |                                                                                                       |
|----|------------------|---|----|----|-------|------|----------|---------------------------------------------------------------------------------|-------------------------------------------------------------------------------------------------------|
| 25 | Weimaraner       | F | 48 | 32 | 1:160 | 40.4 | Positive | Chronic respiratory disease, cough, runny nose, did not respond to antibiotics. | without sequelae. Recovered without sequelae. Recovered without sequelae. Recovered without sequelae. |
| 26 | Mixed            | F | 84 | 6  | 1:160 | 39.6 | Positive | Dorsal abscess, septicemia, anorexia, did not respond to antibiotics.           | without sequelae. Recovered without sequelae. Recovered without sequelae.                             |
| 27 | P. Australian    | M | 96 | 16 | 1:80  | 39.6 | Positive | Respiratory disease, throat inflammation and trachea bronchitis.                | without sequelae. No record, Euthanasia*. Recovered without sequelae. Recovered without sequelae.     |
| 28 | Golden Retriever | M | 48 | 28 | 1:160 | 40.0 | Positive | Respiratory, anorexia, conjunctivitis, melena, ataxia and convulsive.           | with sequelae. Recovered, Euthanasia*. Recovered without sequelae. Recovered without sequelae.        |
| 29 | Dalmatian        | M | 36 | 24 | 1:80  | 40.2 | Positive | Respiratory, conjunctivitis, cough, runny nose and conjunctivitis.              | without sequelae. Recovered without sequelae. Recovered without sequelae.                             |
| 30 | Cocker           | M | 84 | 12 | 1:160 | 39.7 | Positive | Respiratory, digestive, diarrhea with melena, and prostration.                  | without sequelae. Recovered without sequelae. Recovered without sequelae.                             |
| 31 | Pit Bull         | F | 24 | 22 | 1:320 | 39.9 | Positive | Colibacillosis bacterial enteritis, bloody diarrhea / dehydration mucosa.       | without sequelae.                                                                                     |

|    |                            |   |     |     |       |      |          |                                                                                    |                             |
|----|----------------------------|---|-----|-----|-------|------|----------|------------------------------------------------------------------------------------|-----------------------------|
| 32 | English Bulldog            | M | 24  | 18  | 1:80  | 39.6 | Positive | Bacterial respiratory disease, runny nose, and cough.                              | Recovered without sequelae. |
| 33 | Chow Chow                  | F | 84  | 23  | 1:160 | 39.8 | Positive | Respiratory, prostration, nasal discharge and cough.                               | Recovered without sequelae. |
| 34 | Chihuahua                  | M | 6   | 2.8 | 1:80  | 40.3 | Positive | Respiratory, corneal opacity, conjunctivitis, keratosis and melena.                | Died.                       |
| 35 | German Shorthaired Pointer | M | 48  | 25  | 1:40  | 40.5 | Positive | Respiratory, digestive, nasal and ophthalmic discharge, melena and abdominal pain. | Recovered without sequelae. |
| 36 | Labrador                   | F | 120 | 26  | 1:160 | 40.4 | Positive | Respiratory, swollen glands and throat, keratosis, conjunctivitis and cachexia.    | Recovered without sequelae. |
| 37 | Pit Bull                   | M | 15  | 28  | 1:80  | 39.8 | Positive | Respiratory, anorexia, ataxia, nasal and ophthalmic discharge.                     | Recovered without sequelae. |
| 38 | Mixed                      | M | 48  | 19  | 1:160 | 41.1 | Positive | Respiratory, digestive, diarrhea, melena, cachexia and conjunctivitis.             | Recovered without sequelae. |
| 39 | Creole                     | F | 108 | 12  | 1:160 | 39.7 | Positive | Respiratory, anorexia, cachexia, general pain and keratoconjunctivitis.            | Recovered without sequelae. |

|    |                 |   |    |     |       |      |          |                                                                                            |                                       |
|----|-----------------|---|----|-----|-------|------|----------|--------------------------------------------------------------------------------------------|---------------------------------------|
| 40 | Scottish        | F | 96 | 9   | 1:80  | 40.3 | Positive | Respiratory, digestive, cachexia, keratoconjunctivitis melena.                             | Recovered without sequelae.           |
| 41 | Creole          | M | 24 | 5   | 1:160 | 40.3 | Positive | Respiratory, cough, runny nose, keratosis, myoclonus.                                      | Recovered with neurological sequelae. |
| 42 | Schnauzer       | M | 48 | 5.6 | 1:160 | 40.4 | Positive | Respiratory, runny nose, corneal opacity and keratoconjunctivitis.                         | Recovered without sequelae.           |
| 43 | Mixed           | F | 21 | 30  | 1:80  | 39.5 | Positive | Respiratory, conjunctivitis, corneal opacity, keratosis.                                   | Recovered without sequelae.           |
| 44 | German Shepherd | M | 16 | 33  | 1:80  | 40.0 | Positive | Respiratory, runny nose, keratoconjunctivitis, plantar keratosis, cachexia, and myoclonus. | Recovered with neurological sequelae. |
| 45 | Maltese         | F | 12 | 7   | 1:320 | 40.1 | Positive | Respiratory, conjunctivitis, melena and keratosis.                                         | Recovered without sequelae.           |
| 46 | Mixed           | M | 84 | 18  | 1:160 | 40.5 | Positive | Respiratory, digestive, conjunctivitis, diarrhea, with melena and vomiting.                | Recovered without sequelae.           |

|    |                  |   |    |    |       |      |          |                                                                           |                                       |
|----|------------------|---|----|----|-------|------|----------|---------------------------------------------------------------------------|---------------------------------------|
| 47 | Poodle           | M | 18 | 6  | 1:320 | 39.7 | Positive | Respiratory, keratoconjunctivitis, eye discharge and nasal melenas.       | Recovered without sequelae.           |
| 48 | Pit Bull         | F | 32 | 24 | 1:160 | 41.0 | Positive | Digestive, cachexia, conjunctivitis, diarrhea, corneal opacity, jaw tics. | Recovered with neurological sequelae. |
| 49 | Belgian Shepherd | F | 48 | 22 | 1:160 | 39.7 | Positive | Respiratory, cachexia, keratoconjunctivitis and throat inflammation.      | Recovered without sequelae.           |
| 50 | Rottweiler       | M | 36 | 31 | 1:80  | 40.2 | Positive | Digestive, cachexia, diarrhea, melena and keratoconjunctivitis.           | Died.                                 |
| 51 | Chihuahua        | M | 60 | 4  | 1:80  | 39.8 | Positive | Respiratory, runny nose, tracheobronchitis, conjunctivitis, cachexia,     | Recovered without sequelae.           |
| 52 | Mixed            | M | 24 | 11 | 1:80  | 40.2 | Positive | Respiratory, digestive, cachexia, conjunctivitis, melena and prostration. | Recovered without sequelae.           |

M: Male, F: Female, Kg: Kilogram, IgM: Virus-specific immunoglobulin M/Value of immunoglobulin M, Indirect Immunofluorescent Assay (IFA) test was used for the quantification of the IgM, Temp.: Temperature, RT-PCR: Reverse Transcriptase Polymerase Chain Reaction, \*Due to the general discomfort of the dog, the owner suspended the treatment and decided to euthanize.
