# Supplementary material for: Evaluation of the Efficacy and Safety of Silver Nanoparticles in the Treatment of Non-Neurological and Neurological Distemper in Dogs: A Randomized Clinical Trial
Source: MDPI journal article supplement (doi:10.3390/v14112329), 2022-10-24
Supplement: s1 [file s1]

**Table S1.** Support therapy for the treatment of dogs diagnosed with non-neurological and neurological distemper.

| Drug                        | Dose (mg/Kg)                        | Route of administration | Interval between doses (hours) | Treatment duration (days) |
|-----------------------------|-------------------------------------|-------------------------|--------------------------------|---------------------------|
| <b>Antimicrobials</b>       |                                     |                         |                                |                           |
| Ampicillin-amoxicillin      | 20                                  | Oral, IV, SC            | 8                              | 7                         |
| Doxycycline                 | 5-10                                | Oral, IV                | 12                             | 7                         |
| Chloramphenicol             | 15-25                               | Oral, SC                | 8                              | 7                         |
| Florfenicol                 | 25-50                               | SC, IM                  | 8                              | 3-5                       |
| Cephapirin                  | 10-30                               | IM, IV, SC              | 6-8                            | 3-5                       |
| Amoxicillin–clavulanic acid | 12.5-25                             | Oral                    | 12                             | 7                         |
| <b>Antipyretics</b>         |                                     |                         |                                |                           |
| Meloxicam <sup>a</sup>      | 0.2 <sup>d</sup> , 0.1 <sup>c</sup> | Oral, IV, SC            | 24                             | 4-5                       |
| <b>Antiemetics</b>          |                                     |                         |                                |                           |
| Maropitant                  | 1                                   | SC, IV                  | 24                             | 5                         |
| <b>Anticonvulsants</b>      |                                     |                         |                                |                           |
| Phenobarbital               | 2                                   | Oral, IV, IM            | 12                             | As needed                 |
| Pregabalin                  | 3-4                                 | Oral                    | 8                              | As needed                 |
| Levetiracetam               | 20                                  | Oral                    | 6                              | As needed                 |
| Diazepam                    | 0.2                                 | IV                      | 8                              | As needed                 |
| <b>Anti-inflammatories</b>  |                                     |                         |                                |                           |
| Dexamethasone               |                                     |                         |                                |                           |
| CNS edema                   | 1-2                                 | IV                      | 24                             | 1                         |
| Optic neuritis              | 0.1                                 | Oral, IV, SC            | 24                             | 3-5                       |
| Prednisone                  | 2                                   | Oral                    | 24                             | 7                         |
| <b>Vitamins</b>             |                                     |                         |                                |                           |
| Vitamin A                   | 10,000 <sup>d</sup>                 | Oral                    | 24                             | 7                         |
| Vitamin E                   | 100-400 <sup>e</sup>                | Oral                    | 12                             | 7                         |
| Vitamin B12                 | 0.025-0.25 <sup>f</sup>             | V, IM, SC               | 24                             | 7                         |

<sup>a</sup>: They are justified with temperatures above 40°C; <sup>b</sup>: Only the first day; <sup>c</sup>: Continue through days 2 to 5. <sup>d</sup>: UI (International Unit); <sup>e</sup>:mg(milligrams); <sup>f</sup>:pg(picograms); SC: subcutaneous; IV: intravenous; IM: intramuscular. Source: modified from [32,33,35].
